1 **TABLE S1**

2 The following table lists the native continental fishes of Chile, highlighting current knowledge  
 3 about their preferred habitat and/or life history. Abbreviations in the Life history/habitat column  
 4 correspond to: A, anadromous; C, catadromous; Am, amphidromous; P, potadromous; FW,  
 5 obligate freshwater resident; E, euryhaline; SW, indicates either estuarine preference or pseudo-  
 6 complete ocean residency.

7

| FAMILY                  | GENUS                 | SPECIES                                | LIFE HISTORY/HABITAT | GEOGRAPHIC RANGE (Origin) | REFERENCES                                      |
|-------------------------|-----------------------|----------------------------------------|----------------------|---------------------------|-------------------------------------------------|
| <b>Petromyzontidae</b>  | <i>Geotria</i>        | <i>australis</i> (Gray, 1851)          | A                    | Southern Hemisphere       | (McDowall 1988; Neira et al. 1988)              |
| <b>Petromyzontidae</b>  | <i>Mordacia</i>       | <i>lapicida</i> (Gray, 1851)           | A                    | Chile                     | (McDowall 2002)                                 |
| <b>Characidae</b>       | <i>Cheirodon</i>      | <i>pisciculus</i> (Girard, 1855)       | FW                   | Chile                     | (Salas et al. 2012)                             |
| <b>Characidae</b>       | <i>Cheirodon</i>      | <i>australe</i> (Eigenmann, 1927)      | FW                   | Chile                     | (Salas et al. 2012)                             |
| <b>Characidae</b>       | <i>Cheirodon</i>      | <i>galusdae</i> (Eigenmann, 1928)      | FW                   | Chile                     | (Salas et al. 2012)                             |
| <b>Characidae</b>       | <i>Cheirodon</i>      | <i>kiliani</i> (Campos, 1982)          | FW                   | Chile                     | (Salas et al. 2012)                             |
| <b>Diplomystidae</b>    | <i>Diplomystes</i>    | <i>chilensis</i> (Molina, 1782)        | FW                   | Chile                     | (Munoz-Ramirez et al. 2010)                     |
| <b>Diplomystidae</b>    | <i>Diplomystes</i>    | <i>camposensis</i> (Arratia, 1987)     | FW                   | Chile                     | (Munoz-Ramirez et al. 2010)                     |
| <b>Diplomystidae</b>    | <i>Diplomystes</i>    | <i>nahuelbutaensis</i> (Arratia, 1987) | FW                   | Chile                     | (Munoz-Ramirez et al. 2010)                     |
| <b>Trichomycteridae</b> | <i>Nematogenys</i>    | <i>inermis</i> (Guichenot, 1848)       | FW                   | Chile                     | (Habit and Victoriano 2005; Vargas et al. 2015) |
| <b>Trichomycteridae</b> | <i>Trichomycterus</i> | <i>areolatus</i> (Valenciennes, 1846)  | FW                   | Chile                     | (Unmack et al. 2009)                            |
| <b>Trichomycteridae</b> | <i>Trichomycterus</i> | <i>chiltoni</i> (Eigenmann, 1928)      | FW                   | Chile                     | (Habit and Victoriano 2005)                     |
| <b>Trichomycteridae</b> | <i>Trichomycterus</i> | <i>rivulatus</i> (Valenciennes, 1846)  | FW                   | Chile, Peru, Bolivia      | (Pardo et al. 2005; Habit et al. 2006)          |

|                         |                       |                                                              |    |                            |                                                                             |
|-------------------------|-----------------------|--------------------------------------------------------------|----|----------------------------|-----------------------------------------------------------------------------|
| <b>Trichomycteridae</b> | <i>Trichomycterus</i> | <i>chungaraensis</i> (Arratia 1983)                          | FW | Chile                      | (Arratia F. 1983; Vargas et al. 2015)                                       |
| <b>Trichomycteridae</b> | <i>Trichomycterus</i> | <i>laucaensis</i> (Arratia 1983)                             | FW | Chile                      | (Arratia F. 1983; Vargas et al. 2015)                                       |
| <b>Trichomycteridae</b> | <i>Hatcheria</i>      | <i>macraei</i> (Berg, 1985)                                  | FW | Chile, Argentina           | (Unmack et al. 2012; Vargas et al. 2015)                                    |
| <b>Trichomycteridae</b> | <i>Bullockia</i>      | <i>maldonadoi</i> (Eigenmann, 1920)                          | FW | Chile                      | (Habit and Victoriano 2005)                                                 |
| <b>Galaxiidae</b>       | <i>Galaxias</i>       | <i>maculatus</i> (Jenyns, 1842)                              | C  | Southern Hemisphere        | (Górski et al. 2015; Vargas et al. 2015)                                    |
| <b>Galaxiidae</b>       | <i>Galaxias</i>       | <i>globiceps</i> (Eigenmann, 1928)                           | FW | Chile                      | (Murillo & Ruiz 2002)                                                       |
| <b>Galaxiidae</b>       | <i>Galaxias</i>       | <i>platei</i> (Steindachner, 1898)                           | FW | Chile, Argentina           | (Ruzzante et al. 2008; Vargas et al. 2015)                                  |
| <b>Galaxiidae</b>       | <i>Brachygalaxias</i> | <i>bullocki</i> (Regan, 1908)                                | FW | Chile                      | (Habit and Victoriano 2005; Correa-Araneda et al. 2014; Vargas et al. 2015) |
| <b>Galaxiidae</b>       | <i>Brachygalaxias</i> | <i>gothei</i> (Busse, 1983)                                  | FW | Chile                      | (Cuevas et al. 1999; Vargas et al. 2015)                                    |
| <b>Galaxiidae</b>       | <i>Aplochiton</i>     | <i>zebra</i> (Jenyns, 1842)                                  | FW | Chile, Argentina, Malvinas | (Vargas et al. 2015)                                                        |
| <b>Galaxiidae</b>       | <i>Aplochiton</i>     | <i>taeniatus</i> (Eigenmann, 1928)                           | C  | Chile, Argentina, Malvinas | (Vanhaecke et al. 2012; Alò et al. 2013; Vargas et al. 2015)                |
| <b>Galaxiidae</b>       | <i>Aplochiton</i>     | <i>marinus</i> (Jenyns, 1842)                                | C  | Chile                      | (Alò et al. 2013; Vargas et al. 2015)                                       |
| <b>Atherinopsidae</b>   | <i>Basilichthys</i>   | <i>microlepidotus</i> (Jenyns, 1841)(syn: <i>australis</i> ) | FW | Chile                      | (Dyer 2000)                                                                 |
| <b>Atherinopsidae</b>   | <i>Basilichthys</i>   | <i>semotilus</i> (Cope, 1874)                                | P  | Chile, Peru                | (Dyer 2000; Vargas et al. 2015)                                             |
| <b>Atherinopsidae</b>   | <i>Odontesthes</i>    | <i>mauleanum</i> (Steindachner, 1896)                        | E  | Chile                      | (Dyer 2000)                                                                 |
| <b>Atherinopsidae</b>   | <i>Odontesthes</i>    | <i>itatanum</i> (Steindachner, 1896)                         | E  | Chile                      | (Dyer 2000)                                                                 |
| <b>Atherinopsidae</b>   | <i>Odontesthes</i>    | <i>brevianalis</i> (Gunther, 1880)                           | E  | Argentina, Chile           | (Dyer 2000; Ministerio del Medio Ambiente 2013)                             |
| <b>Atherinopsidae</b>   | <i>Odontesthes</i>    | <i>hatchery</i> (Eigenmann, 1909)                            | E  | Argentina, Chile           | (Tsuzuki et al. 2008; Ministerio del Medio Ambiente 2013)                   |

|                        |                    |                                                     |                                                                   |                                        |                                                                                                                                                        |
|------------------------|--------------------|-----------------------------------------------------|-------------------------------------------------------------------|----------------------------------------|--------------------------------------------------------------------------------------------------------------------------------------------------------|
| <b>Atherinopsidae</b>  | <i>Odontesthes</i> | <i>molinae</i> (Fowler, 1940) or<br>(Fischer, 1962) | No information<br>(Possible synonym<br>with other<br>Odontesthes) | Chile                                  | (Campos et al.<br>1998; Vargas et<br>al. 2015)                                                                                                         |
| <b>Atherinopsidae</b>  | <i>Odontesthes</i> | <i>regia</i> (Humboldt, 1821)                       | SW (Juveniles in<br>estuarine)                                    | Peru, Chile,<br>Argentina,<br>Malvinas | (Ministerio del<br>Medio<br>Ambiente 2013)                                                                                                             |
| <b>Atherinopsidae</b>  | <i>Odontesthes</i> | <i>nigricans</i> (Richardson,<br>1848)              | SW (Juveniles in<br>estuarine)                                    | Chile, Argentina,<br>Malvinas          | (Dyer 2000)                                                                                                                                            |
| <b>Atherinopsidae</b>  | <i>Odontesthes</i> | <i>wiebrichi</i> (Eigenmann,<br>1928)               | E (Possible hybrid<br><i>regia/brevianalis</i> )                  | Chile                                  | (Dyer 2000)                                                                                                                                            |
| <b>Cyprinodontidae</b> | <i>Orestias</i>    | <i>agassii</i> (Valenciennes,<br>1846)              | FW                                                                | Peru, Chile                            | (Diario Oficial<br>de la Republica<br>de Chile 2008;<br>Vargas et al.<br>2015)                                                                         |
| <b>Cyprinodontidae</b> | <i>Orestias</i>    | <i>chungarensis</i> (Arratia,<br>1982)              | FW                                                                | Chile                                  | (Diario Oficial<br>de la Republica<br>de Chile 2008;<br>Vargas et al.<br>2015)                                                                         |
| <b>Cyprinodontidae</b> | <i>Orestias</i>    | <i>parinacotensis</i> (Arratia,<br>1982)            | FW                                                                | Chile                                  | (Diario Oficial<br>de la Republica<br>de Chile 2008;<br>Ministerio del<br>Medio<br>Ambiente 2013;<br>Vargas et al.<br>2015)                            |
| <b>Cyprinodontidae</b> | <i>Orestias</i>    | <i>laucaensis</i> (Arratia, 1982)                   | FW                                                                | Chile                                  | (Diario Oficial<br>de la Republica<br>de Chile 2008;<br>Ministerio del<br>Medio<br>Ambiente 2013)                                                      |
| <b>Cyprinodontidae</b> | <i>Orestias</i>    | <i>ascotanensis</i> (Parenti,<br>1984)              | FW                                                                | Chile                                  | (Pardo et al.<br>2005; Vila et al.<br>2007; Diario<br>Oficial de la<br>Republica de<br>Chile 2008;<br>Ministerio del<br>Medio<br>Ambiente 2013)        |
| <b>Cyprinodontidae</b> | <i>Orestias</i>    | <i>gloriae</i> (Vila et al, 2011)                   | FW (Saltpans)                                                     | Chile                                  | (Vila et al.<br>2011)                                                                                                                                  |
| <b>Cyprinodontidae</b> | <i>Orestias</i>    | <i>piacotensis</i> (Vila, 2006)                     | FW                                                                | Chile                                  | (Vila 2006;<br>Ministerio del<br>Medio<br>Ambiente 2013)                                                                                               |
| <b>Mugilidae</b>       | <i>Mugil</i>       | <i>cephalus</i> (Linnaeus, 1758)                    | E/50km upstream FW                                                | Worldwide<br>coastal areas             | (Habit and<br>Victoriano<br>2005; Diario<br>Oficial de la<br>Republica de<br>Chile 2008;<br>Ministerio del<br>Medio<br>Ambiente 2013;<br>Vargas et al. |

|                       |                    |                                 |    |                  |                                                                                                                                   |
|-----------------------|--------------------|---------------------------------|----|------------------|-----------------------------------------------------------------------------------------------------------------------------------|
| <b>Percichthyidae</b> | <i>Percichthys</i> | <i>melanops</i> (Girard, 1855)  | FW | Chile            | (Habit and Victoriano 2005; Diario Oficial de la Republica de Chile 2008; Ministerio del Medio Ambiente 2013; Vargas et al. 2015) |
| <b>Percichthyidae</b> | <i>Percichthys</i> | <i>trucha</i> (Regan, 1905)     | FW | Argentina, Chile | (Ruzzante et al. 2006; Diario Oficial de la Republica de Chile 2008; Vargas et al. 2015)                                          |
| <b>Perciliidae</b>    | <i>Percilia</i>    | <i>gillissi</i> (Girard, 1855)  | FW | Chile            | (Habit and Victoriano 2005; Ministerio del Medio Ambiente 2013; Vargas et al. 2015)                                               |
| <b>Perciliidae</b>    | <i>Percilia</i>    | <i>irwini</i> (Eigenmann, 1928) | FW | Chile            | (Habit and Victoriano 2005; Diario Oficial de la Republica de Chile 2008; Ministerio del Medio Ambiente 2013)                     |

## 8 References

- 9
- 10 Alò D, Correa C, Arias C, Cárdenas L (2013) Diversity of Aplochiton Fishes (Galaxiidea) and
- 11 the Taxonomic Resurrection of *A. marinus*. PLoS One 8:e71577. doi:
- 12 10.1371/journal.pone.0071577
- 13 Arratia F. G (1983) *Trichomycterus chungaraensis* n. sp. and *Trichomycterus laucaensis* n. sp.
- 14 (Pisces, Siluriformes, Trichomycteridae) from the high Andean range. Stud Neotrop Fauna
- 15 Environ 18:65–87. doi: 10.1080/01650528309360621
- 16 Campos HC, Dazarola G, Dyer BS, et al (1998) Categorías de conservación de peces nativos de

17           aguas continentales de Chile. Bol del Mus Nac Hist Nat 47:101–122.

18   Correa-Araneda F, De Los Ríos P, Habit E (2014) Presence of the red jollytail, *Brachygalaxias*  
19           *bullocki* (Regan, 1908) (Galaxiiformes: Galaxiidae), in freshwater forested wetlands from  
20           Chile. Rev Chil Hist Nat 87:1–4. doi: 10.1186/s40693-014-0020-4

21   Cuevas C, Campos H, Busse K (1999) Cytotaxonomic studies on Chilean Galaxiid fishes. The  
22           karyotypes, C-bands, Ag-NORs and Hybrids of *Brachygalaxias gothei* and *B. bullocki*  
23           (Osteichthyes: Galaxiidae). Cytologia (Tokyo) 64:379–385.

24   Diario Oficial de la Republica de Chile (2008) Tercer Proceso de Clasificación de Especies según  
25           su Estado de Conservación.

26   Dyer BS (2000) Systematic review and biogeography of the freshwater fishes of Chile. Estud  
27           Ocean 19:77–98.

28   Górski K, Habit EM, Pingram MA, Manosalva AJ (2015) Variation of the use of marine  
29           resources by *Galaxias maculatus* in large Chilean rivers. Hydrobiologia. doi:  
30           10.1007/s10750-015-2542-4

31   Habit E, Dyer BS, Vila I (2006) Current state of knowledge of freshwater fishes of Chile. Gayana  
32           70:100–113.

33   Habit EM, Victoriano P (2005) Peces de agua dulce de la Cordillera de la Costa. In:  
34           Biodiversidad y Ecología de la Cordillera de la Costa de Chile. pp 374–389

35   McDowall RM (1988) Diadromy in Fishes. Timber Press, Portland, Oregon

36   McDowall RM (2002) Accumulating evidence for a dispersal biogeography of southern cool  
37           temperate freshwater fishes. J Biogeogr 29:207–219. doi: 10.1046/j.1365-  
38           2699.2002.00670.x

39   Ministerio del Medio Ambiente (2013) Especies: Clasificación según estado de conservación.  
40           [http://www.mma.gob.cl/clasificacionespecies/doc/UNIFICADA\\_de\\_Especie\\_Estado\\_Conse](http://www.mma.gob.cl/clasificacionespecies/doc/UNIFICADA_de_Especie_Estado_Conse)  
41           rvacion\_Nov2014\_publico.xls.

42 Munoz-Ramirez C, Jara A, Beltran-Concha M, et al (2010) Distribucion de la familia  
43 Diplomystidae (Pisces: Siluriformes) en Chile: Nuevos Registros. Bol Biodivers Chile 4:6–  
44 17.

45 Murillo & Ruiz (2002) El Puye *Galaxias Globiceps*. Gayana 66:191–197. doi:  
46 10.13140/RG.2.1.5180.0481

47 Neira FJ, Bradley JS, Potter IC, Hilliard RW (1988) Morphological variation among widely  
48 dispersed larval populations of anadromous southern hemisphere lampreys (Geotriidae and  
49 Mordaciidae). Zool J Linn Soc 92:383–408. doi: 10.1111/j.1096-3642.1988.tb01730.x

50 Pardo R, Scott S, Vila I (2005) Analisis de formas en especies Chilenas del  
51 genero *Trichomycterus* (Osteichthyes: Siluriformes) utilizando morfometria geometrica.  
52 Gayana (Concepción) 69:180–183. doi: 10.4067/S0717-65382005000100023

53 Ruzzante DE, Walde SJ, Cussac VE, et al (2006) Phylogeography of the Percichthyidae (Pisces)  
54 in Patagonia: roles of orogeny, glaciation, and volcanism. Mol Ecol 15:2949–68. doi:  
55 10.1111/j.1365-294X.2006.03010.x

56 Ruzzante DE, Walde SJ, Gosse JC, et al (2008) Climate control on ancestral population  
57 dynamics: insight from Patagonian fish phylogeography. Mol Ecol 17:2234–44. doi:  
58 10.1111/j.1365-294X.2008.03738.x

59 Salas D, Veliz D, Scott S (2012) Diferenciación morfológica en especies del género *Cheirodon* (  
60 Ostariophysi : Characidae ) mediante morfometría tradicional y geométrica. 76:142–152.

61 Tsuzuki MY, Strüssmann CA, Takashima F (2008) Effect of salinity on the oxygen consumption  
62 of larvae of the silversides *Odontesthes hatcheria* and *O. bonariensis* (Osteichthyes,  
63 Atherinopsidae). Brazilian Arch Biol Technol 51:563–567. doi: 10.1590/S1516-  
64 89132008000300017

65 Unmack PJ, Barriga JP, Battini M a., et al (2012) Phylogeography of the catfish *Hatcheria*  
66 *macraei* reveals a negligible role of drainage divides in structuring populations. Mol Ecol

67 21:942–959. doi: 10.1111/j.1365-294X.2011.05408.x

68 Unmack PJ, Bennin AP, Habit EM, et al (2009) Impact of ocean barriers, topography, and  
69 glaciation on the phylogeography of the catfish *Trichomycterus areolatus* (Teleostei:  
70 Trichomycteridae) in Chile. Biol J Linn Soc 97:876–892. doi: 10.1111/j.1095-  
71 8312.2009.01224.x

72 Vanhaecke D, Garcia de Leaniz C, Gajardo G, et al (2012) DNA barcoding and microsatellites  
73 help species delimitation and hybrid identification in endangered galaxiid fishes. PLoS One  
74 7:e32939. doi: 10.1371/journal.pone.0032939

75 Vargas P V., Arismendi I, Gomez-uchida D (2015) Evaluating taxonomic homogenization of  
76 freshwater fish assemblages in Chile. Rev Chil Hist Nat. doi: 10.1186/s40693-015-0046-2

77 Vila I (2006) A New Species of Killifish in the Genus *Orestias* (Teleostei: Cyprinodontidae)  
78 from the Southern High Andes, Chile. Copeia 2006:472–477. doi: 10.1643/0045-  
79 8511(2006)2006[472:ANSOKI]2.0.CO;2

80 Vila I, Mendez MA, Scott S, et al (2007) Threatened fishes of the world: *Orestias ascotanensis*  
81 Parenti, 1984 (Cyprinodontidae). Environ Biol Fishes 80:491–492. doi: 10.1007/s10641-  
82 006-9150-0

83 Vila I, Scott S, Mendez MA, et al (2011) *Orestias gloriae*, a new species of cyprinodontid fish  
84 from saltpan spring of the southern high Andes (Teleostei: Cyprinodontidae). Ichthyol  
85 Explor Freshwaters 22:345–353.

86
